# Supplementary material for: Elevated levels of inflammatory plasma biomarkers are associated with risk of HIV infection
Source: PubMed Central journal article supplement (PMC7968240; doi:10.1186/s12977-021-00552-6), 2021-03-17
Supplement: 12977_2021_552_MOESM1_ESM.pdf [file 12977_2021_552_MOESM1_ESM.pdf]

|                                        | Zambia | Rwanda |
|----------------------------------------|--------|--------|
| Total # of individuals in cohort       | 38     | 30     |
| # in the uninfected cohort             | 19     | 17     |
| # of males                             | 8      | 7      |
| # of females                           | 11     | 10     |
| # with genital inflammation/ulceration | 3      | 2      |
| # with positive Schistosomiasis titers | 1      | 3      |
| Median days from enrollment            | 1234   | 494    |
| # in the preinfection cohort           | 19     | 13     |
| # of males                             | 11     | 7      |
| # of females                           | 8      | 6      |
| # with genital inflammation/ulceration | 7      | 1      |
| # with positive Schistosomiasis titers | 11     | 2      |
| Median days from enrollment            | 1087   | 457    |
| Median days before infection           | 46     | 45     |
