# Supplementary material for: Elevated levels of inflammatory plasma biomarkers are associated with risk of HIV infection
Source: PubMed Central journal article supplement (PMC7968240; doi:10.1186/s12977-021-00552-6), 2021-03-17
Supplement: 12977_2021_552_MOESM3_ESM.pdf [file 12977_2021_552_MOESM3_ESM.pdf]

|             | Uninfected     |             | Preinfection   |             |             |
|-------------|----------------|-------------|----------------|-------------|-------------|
|             | Median (pg/ml) | IQR (pg/ml) | Median (pg/ml) | IQR (pg/ml) | FDR p-value |
| Fractalkine | 71.42          | 23.67       | 99.15          | 38.73       | 0.00042     |
| GM-CSF      | 10.8           | 6.255       | 18.76          | 9.9425      | 0.0021      |
| ITAC        | 13.17          | 7.985       | 38.67          | 33.7325     | 0.00042     |
| IL-1b       | 0.42           | 0.205       | 0.67           | 0.4575      | 0.00105     |
| IL-2        | 1.3            | 0.56        | 2.03           | 1.6275      | 0.00289     |
| IL-5        | 3.12           | 1.81        | 4.23           | 2.21        | 0.01431     |
| IL-6        | 1.13           | 1.72        | 2.37           | 1.565       | 0.00382     |
| IL-7        | 5.01           | 1.775       | 8.385          | 3.3525      | 0.00042     |
| IL-8        | 2.52           | 2.355       | 5.465          | 3.33        | 0.00042     |
| IL-10       | 12.41          | 9.2         | 19.365         | 13.2275     | 0.00574     |
| IL-12       | 1.415          | 0.8725      | 1.88           | 1.1425      | 0.02532     |
| IL-17a      | 4.75           | 5.895       | 7.475          | 3.695       | 0.00378     |
| IL-21       | 1.43           | 1.33        | 2.4            | 1.5225      | 0.02112     |
| IL-23       | 82.23          | 56.245      | 134.775        | 88.9275     | 0.00465     |
| MIP-1a      | 18.17          | 6.965       | 23.685         | 7.885       | 0.00373     |
| MIP-1b      | 3.85           | 2.06        | 6.18           | 7.885       | 0.00465     |
| MIP-3a      | 7.11           | 5.065       | 9.54           | 4.78        | 0.00465     |
| TNFa        | 1.8            | 1.005       | 3.015          | 1.985       | 0.00042     |
|             |                |             |                |             |             |
| IFNg        | 7.21           | 5.24        | 8.56           | 5.0825      | 0.1155      |
| IL-4        | 15.3           | 7.22        | 18.495         | 16.03       | 0.15561     |
| IL-13       | 2.56           | 2.53        | 2.705          | 2.14        | 0.8026      |
