# Supplementary material for: Elevated levels of inflammatory plasma biomarkers are associated with risk of HIV infection
Source: PubMed Central journal article supplement (PMC7968240; doi:10.1186/s12977-021-00552-6), 2021-03-17
Supplement: 12977_2021_552_MOESM4_ESM.pdf [file 12977_2021_552_MOESM4_ESM.pdf]

| <b>(A)</b><br><b>Biomarkers</b> | <b>VIP</b>    | <b>(B)</b><br><b>Biomarkers</b> | <b>VIP</b>    | <b>(C)</b><br><b>Biomarkers</b> | <b>VIP</b>    |
|---------------------------------|---------------|---------------------------------|---------------|---------------------------------|---------------|
| <b>Fractalkine</b>              | <b>1.3259</b> | <b>Fractalkine</b>              | <b>0.9901</b> | <b>Fractalkine</b>              | <b>0.2223</b> |
| <b>GM-CSF</b>                   | <b>1.0385</b> | <b>GM-CSF</b>                   | <b>1.301</b>  | <b>GM-CSF</b>                   | <b>0.4878</b> |
| <b>IFN<math>\gamma</math></b>   | <b>0.8451</b> | <b>IFN<math>\gamma</math></b>   | <b>0.9651</b> | <b>IFN<math>\gamma</math></b>   | <b>0.7346</b> |
| <b>IL-1b</b>                    | <b>1.1681</b> | <b>IL-1b</b>                    | <b>1.0939</b> | <b>IL-1b</b>                    | <b>0.4392</b> |
| <b>IL-2</b>                     | <b>1.0777</b> | <b>IL-2</b>                     | <b>1.2672</b> | <b>IL-2</b>                     | <b>0.4389</b> |
| <b>IL-4</b>                     | <b>0.3220</b> | <b>IL-4</b>                     | <b>0.1382</b> | <b>IL-4</b>                     | <b>0.0978</b> |
| <b>IL-5</b>                     | <b>1.0302</b> | <b>IL-5</b>                     | <b>0.8081</b> | <b>IL-5</b>                     | <b>1.5860</b> |
| <b>IL-6</b>                     | <b>0.7652</b> | <b>IL-6</b>                     | <b>0.9391</b> | <b>IL-6</b>                     | <b>0.6227</b> |
| <b>IL-7</b>                     | <b>1.3083</b> | <b>IL-7</b>                     | <b>1.5326</b> | <b>IL-7</b>                     | <b>0.9155</b> |
| <b>IL-8</b>                     | <b>1.1564</b> | <b>IL-8</b>                     | <b>1.2471</b> | <b>IL-8</b>                     | <b>2.0761</b> |
| <b>IL-10</b>                    | <b>0.9766</b> | <b>IL-10</b>                    | <b>0.8721</b> | <b>IL-10</b>                    | <b>0.4507</b> |
| <b>IL-12 (p70)</b>              | <b>0.8602</b> | <b>IL-12 (p70)</b>              | <b>0.7555</b> | <b>IL-12 (p70)</b>              | <b>0.6799</b> |
| <b>IL-13</b>                    | <b>0.5169</b> | <b>IL-13</b>                    | <b>0.453</b>  | <b>IL-13</b>                    | <b>0.3421</b> |
| <b>IL-17a</b>                   | <b>0.9232</b> | <b>IL-17a</b>                   | <b>0.8391</b> | <b>IL-17a</b>                   | <b>0.6320</b> |
| <b>IL-21</b>                    | <b>0.8949</b> | <b>IL-21</b>                    | <b>0.9531</b> | <b>IL-21</b>                    | <b>0.5320</b> |
| <b>IL-23</b>                    | <b>0.9879</b> | <b>IL-23</b>                    | <b>0.6269</b> | <b>IL-23</b>                    | <b>0.6380</b> |
| <b>ITAC</b>                     | <b>1.5373</b> | <b>ITAC</b>                     | <b>1.3263</b> | <b>ITAC</b>                     | <b>2.7488</b> |
| <b>MIP-1a</b>                   | <b>0.5792</b> | <b>MIP-1a</b>                   | <b>1.2595</b> | <b>MIP-1a</b>                   | <b>1.1830</b> |
| <b>MIP-1b</b>                   | <b>1.1439</b> | <b>MIP-1b</b>                   | <b>1.0304</b> | <b>MIP-1b</b>                   | <b>0.7871</b> |
| <b>MIP-3a</b>                   | <b>0.3005</b> | <b>MIP-3a</b>                   | <b>0.0568</b> | <b>MIP-3a</b>                   | <b>0.0651</b> |
| <b>TNF<math>\alpha</math></b>   | <b>1.1986</b> | <b>TNF<math>\alpha</math></b>   | <b>1.0876</b> | <b>TNF<math>\alpha</math></b>   | <b>0.5248</b> |
