# Supplementary material for: Elevated levels of inflammatory plasma biomarkers are associated with risk of HIV infection
Source: PubMed Central journal article supplement (PMC7968240; doi:10.1186/s12977-021-00552-6), 2021-03-17
Supplement: 12977_2021_552_MOESM5_ESM.pdf [file 12977_2021_552_MOESM5_ESM.pdf]

|                | Uninfected     |             | Preinfection   |             |             | Uninfected    |                | Preinfection |                |             |             |
|----------------|----------------|-------------|----------------|-------------|-------------|---------------|----------------|--------------|----------------|-------------|-------------|
| <b>A</b>       | Median (pg/ml) | IQR (pg/ml) | Median (pg/ml) | IQR (pg/ml) | FDR p-value | <b>B</b>      | Median (pg/ml) | IQR (pg/ml)  | Median (pg/ml) | IQR (pg/ml) | FDR P-value |
| Fractalkine    | 77.48          | 17.79       | 92.39          | 29.16       | 0.0387      | Fractalkine   | 64.67          | 15.685       | 106.78         | 45.15       | 0.0021      |
| GMCSF          | 9.37           | 3.06        | 15.12          | 8.08        | 0.0287      | IL-7          | 5.01           | 2.165        | 8.47           | 2.955       | 0.0042      |
| IL-1 $\beta$   | 0.38           | 0.16        | 0.62           | 0.26        | 0.0287      | IL-8          | 2.5            | 2.9625       | 5.82           | 2.395       | 0.0026      |
| IL-6           | 0.99           | 1.4725      | 2.47           | 1.295       | 0.0352      | IL-23         | 79.03          | 45.565       | 146.59         | 65.405      | 0.0021      |
| IL-7           | 5.12           | 1.46        | 8.09           | 4.18        | 0.0287      | ITAC          | 12.3           | 5.8075       | 45.81          | 59.255      | 0.0021      |
| IL-8           | 2.54           | 1.29        | 5.07           | 3.95        | 0.0339      | TNF- $\alpha$ | 1.86           | 0.9025       | 3.12           | 2.045       | 0.0119      |
| ITAC           | 13.87          | 8.42        | 31.21          | 21.18       | 0.0287      |               |                |              |                |             |             |
| MIP-1 $\alpha$ | 15.04          | 4.06        | 22.54          | 8.87        | 0.0287      |               |                |              |                |             |             |
| TNF- $\alpha$  | 1.74           | 0.98        | 2.95           | 0.92        | 0.0287      |               |                |              |                |             |             |
