# Supplementary material for: Elevated levels of inflammatory plasma biomarkers are associated with risk of HIV infection
Source: PubMed Central journal article supplement (PMC7968240; doi:10.1186/s12977-021-00552-6), 2021-03-17

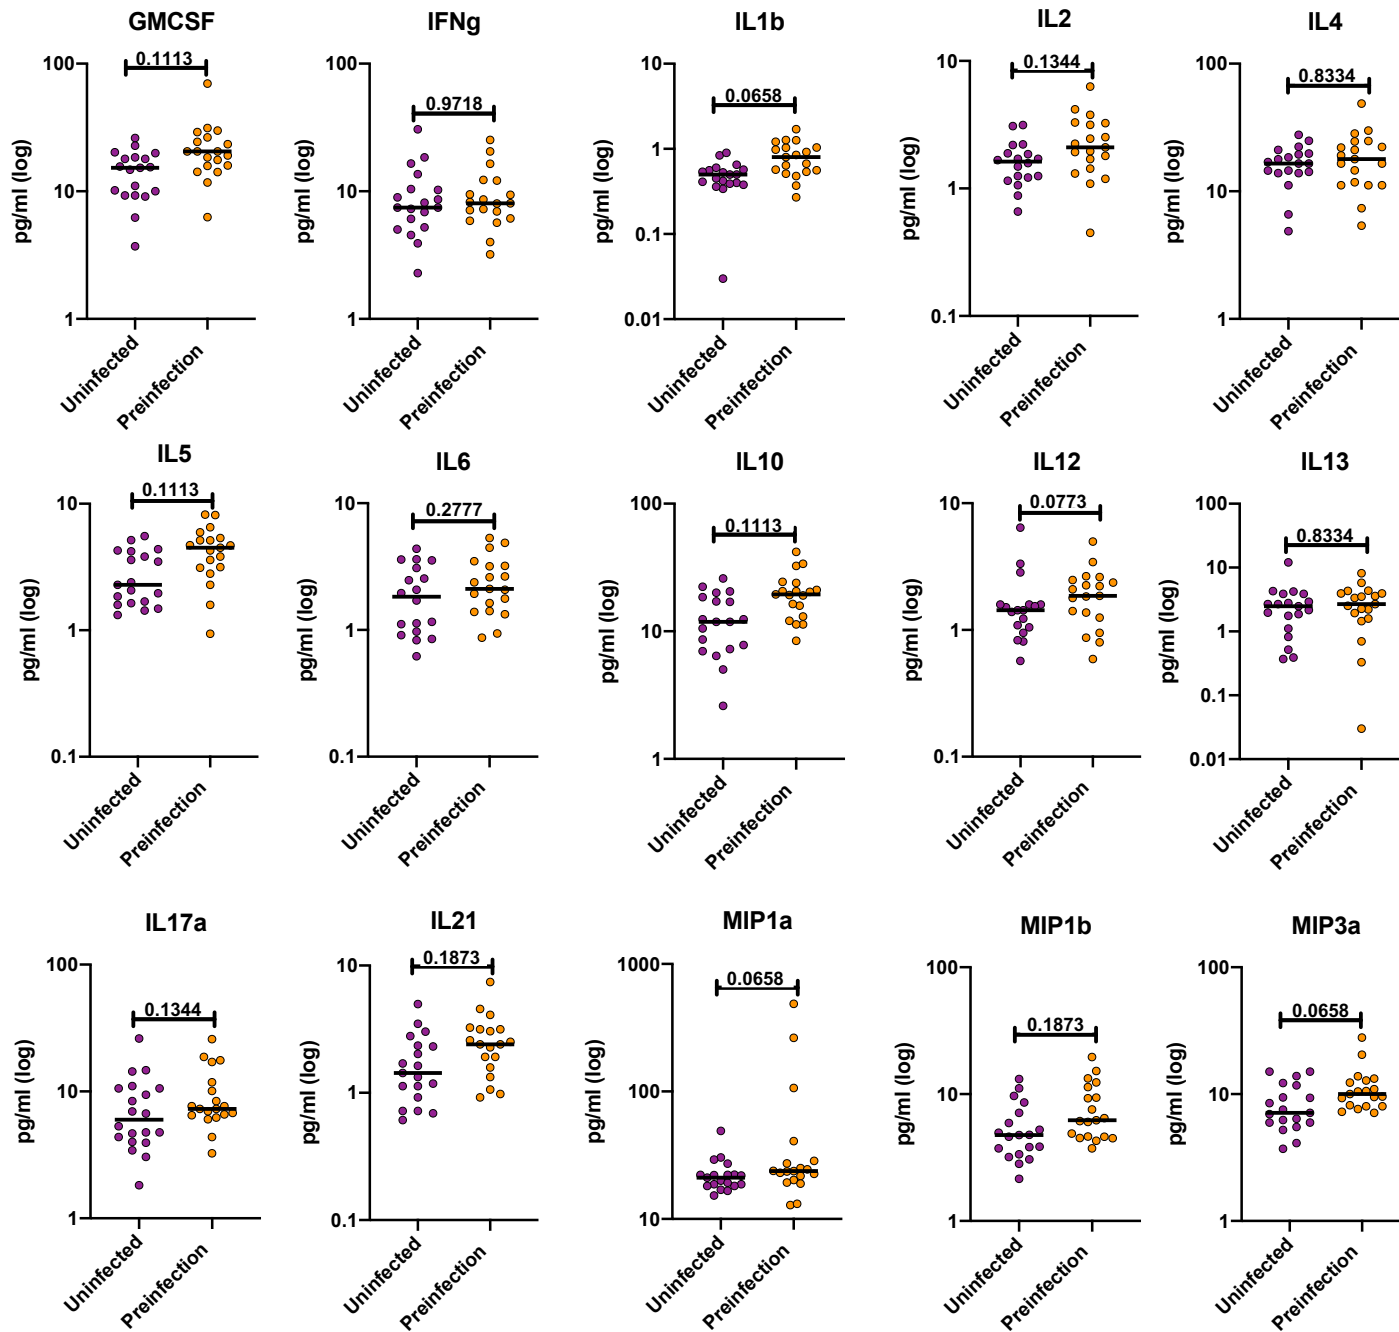

Supplement: 12977_2021_552_MOESM7_ESM.pdf [file 12977_2021_552_MOESM7_ESM.pdf]
