# Supplementary material for: Elevated levels of inflammatory plasma biomarkers are associated with risk of HIV infection
Source: PubMed Central journal article supplement (PMC7968240; doi:10.1186/s12977-021-00552-6), 2021-03-17
Supplement: 12977_2021_552_MOESM9_ESM.pdf [file 12977_2021_552_MOESM9_ESM.pdf]

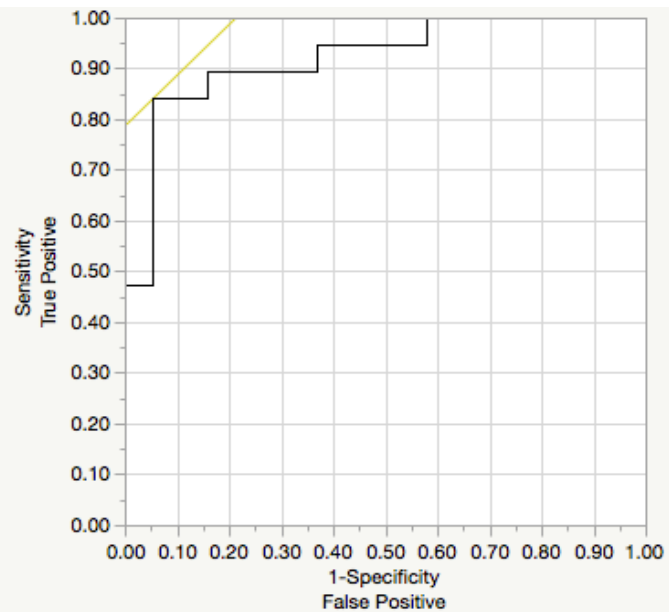

Using Pre/UI='1' to be the positive level

**AUC**  
0.92244

**ITAC**

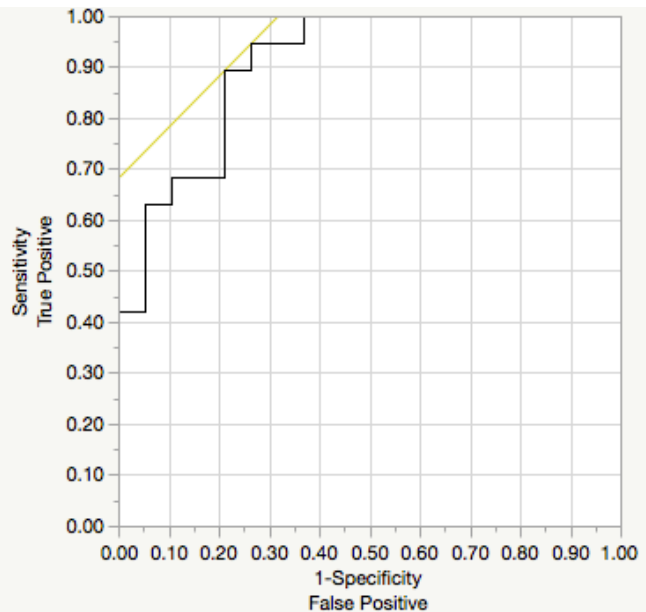

Using Pre/UI='1' to be the positive level

**AUC**  
0.90582

**Fractalkine**

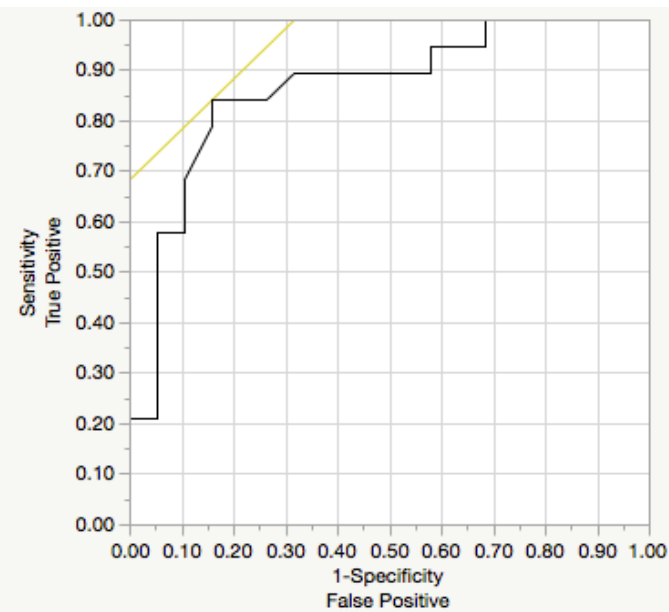

Using Pre/UI='1' to be the positive level

**AUC**  
0.86565

**IL23**

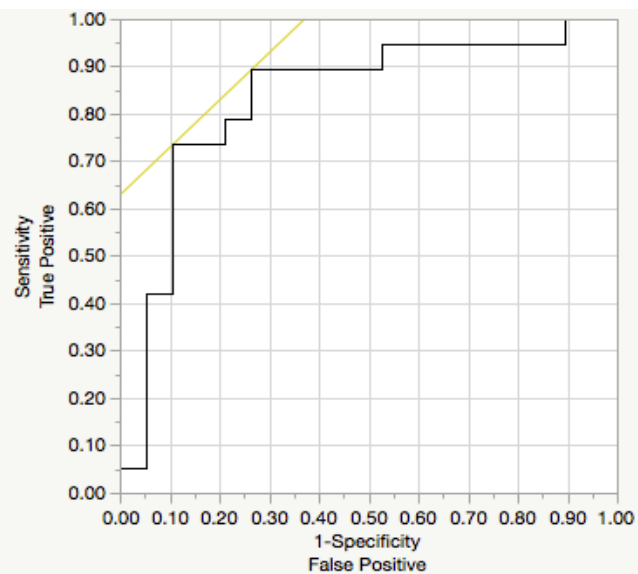

Using Pre/UI='1' to be the positive level

**AUC**  
0.83380

**IL7**

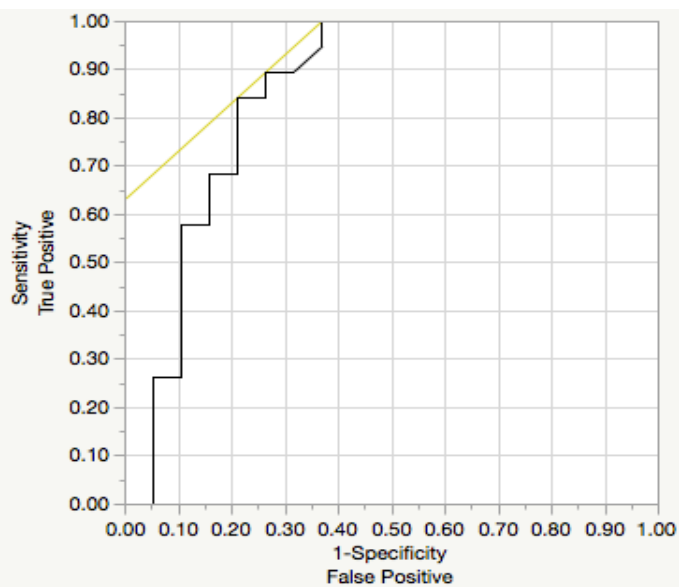

Using Pre/UI='1' to be the positive level

**AUC**  
0.85180

**IL8**

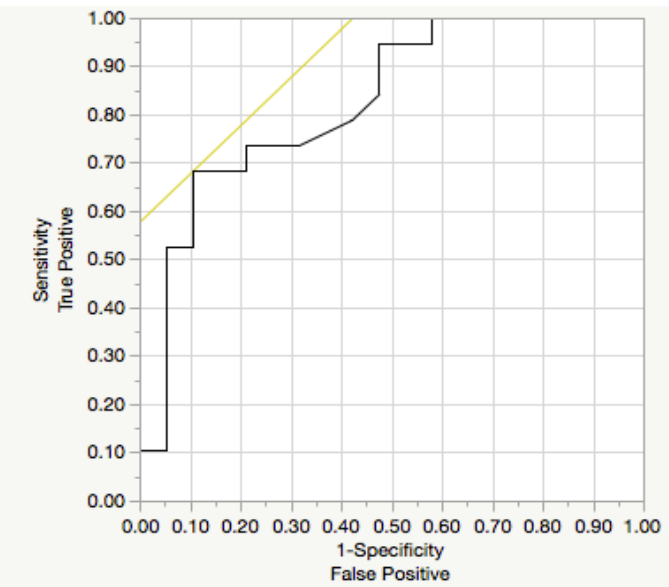

Using Pre/UI='1' to be the positive level

**AUC**  
0.82687

**TNFa**
