# Supplementary material for: Elevated levels of inflammatory plasma biomarkers are associated with risk of HIV infection
Source: PubMed Central journal article supplement (PMC7968240; doi:10.1186/s12977-021-00552-6), 2021-03-17
Supplement: 12977_2021_552_MOESM10_ESM.pdf [file 12977_2021_552_MOESM10_ESM.pdf]

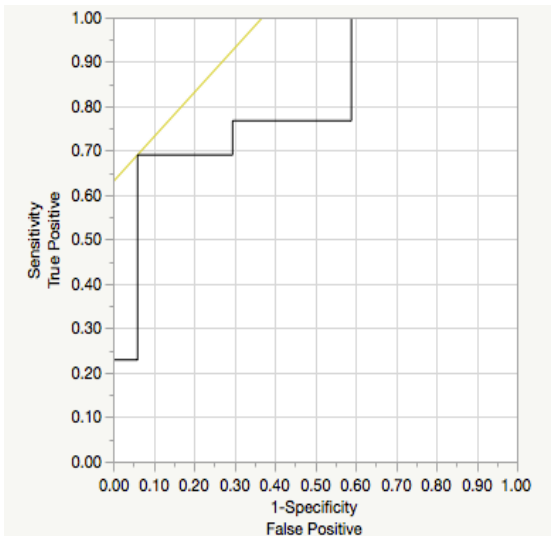

Using Pre/UI='1' to be the positive level

**AUC**  
0.81448

**ITAC**

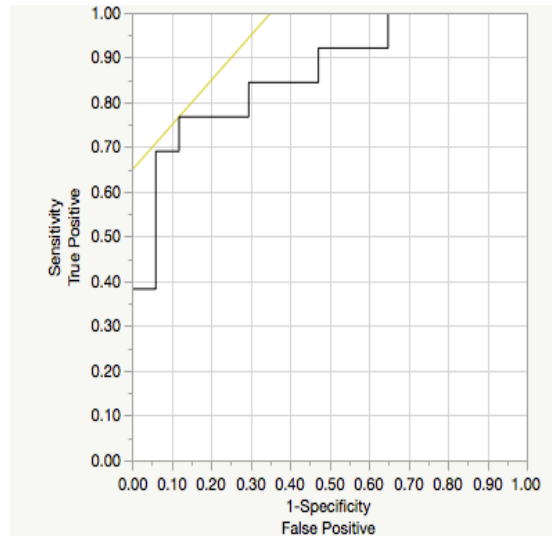

Using Pre/UI='1' to be the positive level

**AUC**  
0.86425

**GMCSF**

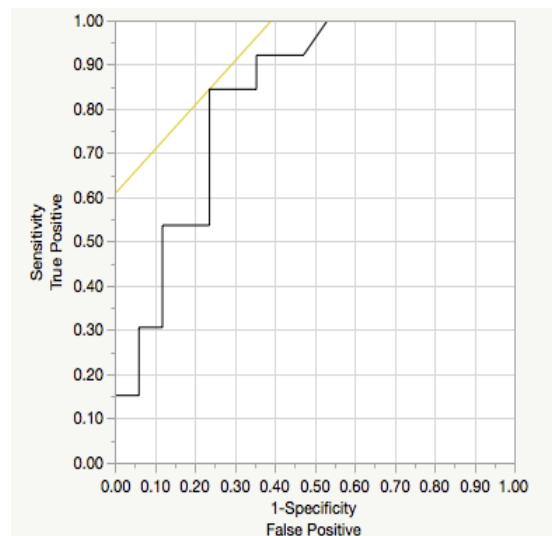

Using Pre/UI='1' to be the positive level

**AUC**  
0.82579

**IL1b**

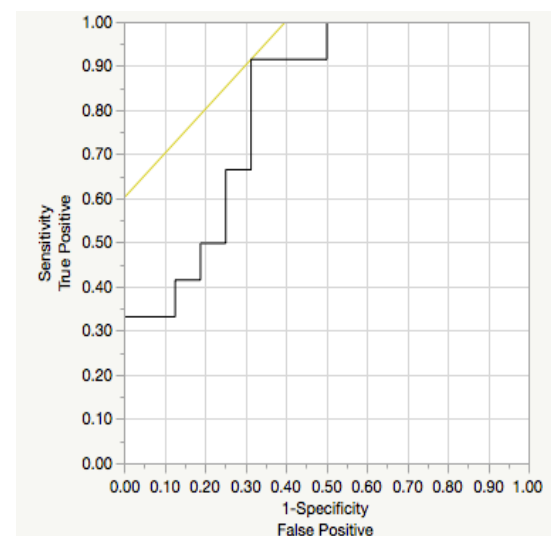

Using Pre/UI='1' to be the positive level

**AUC**  
0.81250

**IL6**

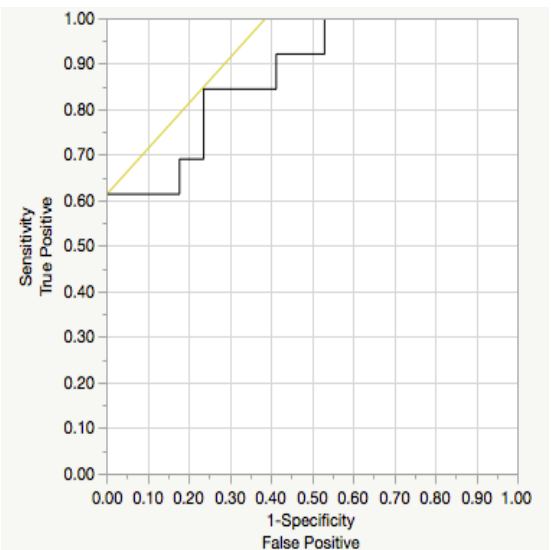

Using Pre/UI='1' to be the positive level

**AUC**  
0.87783

**IL7**

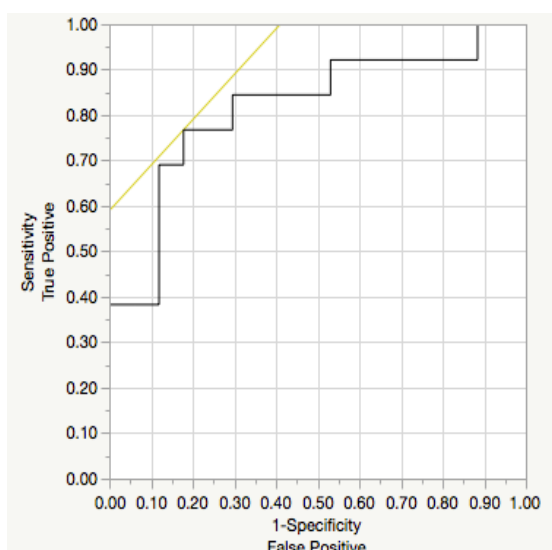

Using Pre/UI='1' to be the positive level

**AUC**  
0.81900

**IL8**

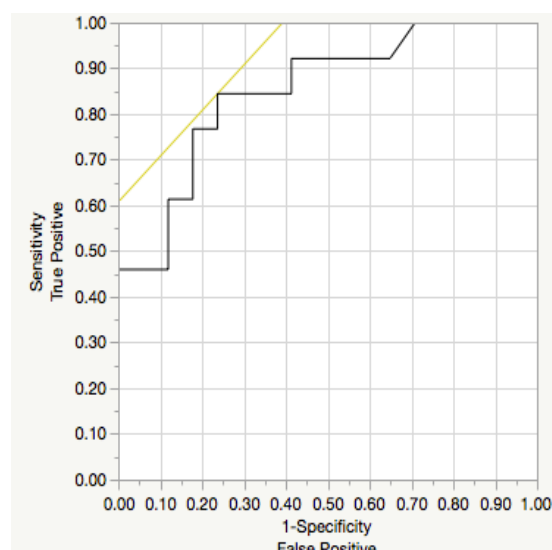

Using Pre/UI='1' to be the positive level

**AUC**  
0.85294

**MIP1a**

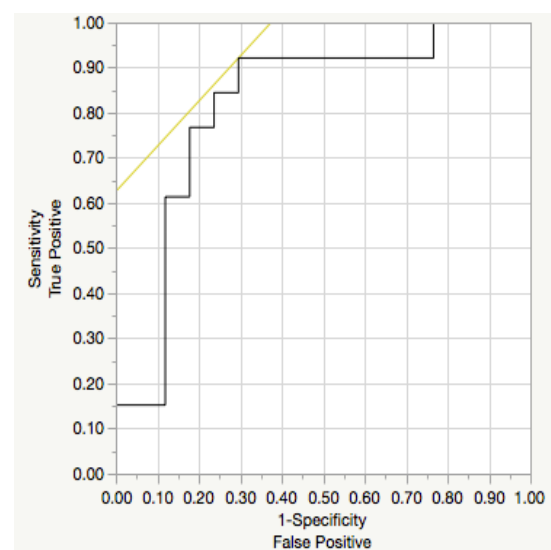

Using Pre/UI='1' to be the positive level

**AUC**  
0.81900

**TNFa**
