# Supplementary material for: Elevated levels of inflammatory plasma biomarkers are associated with risk of HIV infection
Source: PubMed Central journal article supplement (PMC7968240; doi:10.1186/s12977-021-00552-6), 2021-03-17
Supplement: 12977_2021_552_MOESM11_ESM.pdf [file 12977_2021_552_MOESM11_ESM.pdf]

| <b>Disease or Infection</b>             | <b>Elevated biomarkers</b>                                                                         |
|-----------------------------------------|----------------------------------------------------------------------------------------------------|
| <b>Hepatitis C Virus and HIV</b>        | IL-1b, IL-6, TNFa, IL-8, CXCL10 (22)                                                               |
| <b>Hepatitis C Virus</b>                | IFNg, IL-17 (21, 22)                                                                               |
| <b>P. falciparum</b>                    | TNFa, IFNg, IL-1, IL-6, IL-12, IL-4, sTNFRI, sTNFRII (25, 26)                                      |
| <b>P.vivax</b>                          | IL-6, IL-17, IL-12, TNFa, MCP1, CRP, IFNg (27, 28)                                                 |
| <b>Tuberculosis</b>                     | IL-10, IL-1a, IP-10, MCP1, TNFa, IL-2, IFNg, GMCSF, IL-3, IL-13, MIP-1b, IL-5, IL-10, VEGF (29-32) |
| <b>S. stercoralis and tuberculosis</b>  | IL-5, IL-13, IL-17, IL-22, IL-10 (34)                                                              |
| <b>Type 2 Diabetes</b>                  | Fractalkine (41)                                                                                   |
| <b>Systemic Lupus Erythematosus</b>     | Fractalkine (40)                                                                                   |
| <b>Systemic Sclerosis</b>               | Fractalkine, ITAC, CXCL10 (42)                                                                     |
| <b>Inflammatory Bowel Disease</b>       | ITAC (43)                                                                                          |
| <b>Sarcoidosis</b>                      | ITAC (43)                                                                                          |
| <b>Fibromyalgia</b>                     | ITAC, IL-7 (46)                                                                                    |
| <b>Colorectal and Esophageal Cancer</b> | IL-7 (47)                                                                                          |
